# Supplementary material for: Assessment of body composition in spinal cord injury: A scoping review
Source: PubMed Central journal article supplement (PMC8104368; doi:10.1371/journal.pone.0251142), 2021-05-07
Supplement: pone.0251142.s003.pdf [file pone.0251142.s003.pdf]

## Summary of discussions during workshops with people with lived SCI and body composition assessment experience

|             | Body mass/ BMI                                            | Skinfold<br>Callipers                   | BIA                                                                                                                 | Waist circumference                                                        | Hydrostatic<br>Weighing                                                                    | DXA                                                                                                                                                                                                                                               |
|-------------|-----------------------------------------------------------|-----------------------------------------|---------------------------------------------------------------------------------------------------------------------|----------------------------------------------------------------------------|--------------------------------------------------------------------------------------------|---------------------------------------------------------------------------------------------------------------------------------------------------------------------------------------------------------------------------------------------------|
| Preferences | Use my scale at home, to see if I have gained weight.     | Nice and simple, if they were accurate. | I love the BIA because it is so simple. More adaptable, anything at home.                                           |                                                                            | If it is accessible. Even underwater, I would not care. Especially if it is most accurate. | DXA, it was fine. They do DXA here all the time. It's fast and easy. No problems with skin. Over a period of time, for both bone and fat.                                                                                                         |
| Barriers    | You don't get weighed a lot when you are in a wheelchair. | I did not even bother with my legs.     | The scales [BIA] did not work. Break a bone when measuring on BIA with a standing frame. Obviously that one is out. | My waistline has always been too big. While sitting now, it's just bigger. | Not discussed                                                                              | I can't even get on DXA bed as it's so much higher than my chair. Inconvenience is making the appointment, put you on the time, etc. I get a lot of pain when I am lying flat. If a DXA scan has metal, it does not work. Radiation is a concern. |
| Comments    | When I weigh myself, it is all fat?                       |                                         |                                                                                                                     |                                                                            |                                                                                            | Do the DXA scores go in the same pool as the able-bodied population?                                                                                                                                                                              |

---

|          |                                                                                                                                                                                                                                                                                                                                                                                                                                                                                                                                                                                                                                                                                                                                                                                                                                                                                                                                                                                                                                                                                                                                                                                                                                                                                                                                                                                                       |
|----------|-------------------------------------------------------------------------------------------------------------------------------------------------------------------------------------------------------------------------------------------------------------------------------------------------------------------------------------------------------------------------------------------------------------------------------------------------------------------------------------------------------------------------------------------------------------------------------------------------------------------------------------------------------------------------------------------------------------------------------------------------------------------------------------------------------------------------------------------------------------------------------------------------------------------------------------------------------------------------------------------------------------------------------------------------------------------------------------------------------------------------------------------------------------------------------------------------------------------------------------------------------------------------------------------------------------------------------------------------------------------------------------------------------|
| General  | - Very important.                                                                                                                                                                                                                                                                                                                                                                                                                                                                                                                                                                                                                                                                                                                                                                                                                                                                                                                                                                                                                                                                                                                                                                                                                                                                                                                                                                                     |
| Comments | <ul style="list-style-type: none"><li>- Predict a lot about potential health. Tells us something how different we are from the able-bodied population. Good for medical populations.</li><li>- Over long term would be helpful. Knowing where you stand.</li><li>- Consistent measure even if it was not accurate.</li><li>- There's just nothing.</li><li>- As long as it is reliable and accurate, I feel that most people I think would go for accurate over convenience.</li><li>- Anything would be helpful.</li><li>- Probably not interested in fat mass; just use weight.</li><li>- I'd like to know. If it's SCI specific.</li><li>- Affects how you want to change your lifestyle (eating, exercise).</li><li>- You need a more specific guideline to go along with an accurate measure.</li><li>- If it was causing harm then I would not do that.</li><li>- Only if it was really important for monitoring health.</li><li>- I think you start obsessing on it over. That's with everything with health-related stuff.</li><li>- I don't see any problems, as long as it is valid. Considering body type, genetics, diet.</li><li>- Just focussing on that [parameters], you can't even enjoy your body anymore.</li><li>- You need people who understand paralysis. For example. It's about vigilance. If you have a C4 who is overweight, how do you really help that person?</li></ul> |

---
