# Supplementary material for: Assessment of body composition in spinal cord injury: A scoping review
Source: PubMed Central journal article supplement (PMC8104368; doi:10.1371/journal.pone.0251142), 2021-05-07
Supplement: pone.0251142.s004.pdf [file pone.0251142.s004.pdf]

**Summary of interactive surveys of international practitioners working in the field of body composition for SCI (e.g. SCI clinicians, nutritionists, physiologists)**

|             | Body mass/ BMI                                                                       | Skinfold Callipers                                                                                                                                                                                                                                                                                                                                                                            | BIA                        | Waist circumference             | ADP                               | DXA                                                                                                                                                  |
|-------------|--------------------------------------------------------------------------------------|-----------------------------------------------------------------------------------------------------------------------------------------------------------------------------------------------------------------------------------------------------------------------------------------------------------------------------------------------------------------------------------------------|----------------------------|---------------------------------|-----------------------------------|------------------------------------------------------------------------------------------------------------------------------------------------------|
| Preferences | BMI - Not recommended to be used.                                                    | Mixed views on using this method.                                                                                                                                                                                                                                                                                                                                                             | Unsure to use this method. | Undecided on using this method. | Mixed views on using this method. | Very confident with using this method.                                                                                                               |
| Barriers    | Really don't think we should be using BMI given it only gives you mass, nothing else | Hard to standardise seated position when taking. Leads to difficulties getting to sites. When using skinfolds, I do not use equations for calculating % BF. As a repeatable measure within specific athletes I think it is a good measure. Positional difficulties. Athletes desire to measure skinfolds on lower limbs (unsure of accuracy and also worried about potential damage to skin). | Cost and access to kit.    | Not discussed                   | Cost and access to kit.           | Ethical considerations for signing off a DXA in a sport-setting as a tracking tool. Consistent placement of body during DXA. Cost and access to kit. |

---

|          |                                                                                                                                                                                |
|----------|--------------------------------------------------------------------------------------------------------------------------------------------------------------------------------|
| General  | - Educational tool, can be helpful to prevent problems we are currently seeing, e.g. ordering a wheelchair but people not fitting in it                                        |
| Comments | anymore after it arrives (i.e. 3 months later) due to fat mass increases.                                                                                                      |
|          | - Muscle mass more important than fat mass, because fat mass will vary so much more across life, while muscle mass less so and therefore may be a better indicator of CV risk. |
|          | - Depends on the relationship with CV markers and such, if/how I consider reliability/validity.                                                                                |
|          | - Depends on what you're using it for, tracking changes over time or something else.                                                                                           |

---
